# Supplementary material for: Frequency tracking in acoustic trapping for improved performance stability and system surveillance
Source: Royal Society of Chemistry journal article supplement (doi:10.1039/c3lc51144h), 2013-12-13

## Supplementary 2

### Verification flowrates

To verify which frequency had the of the optimal trapping performance six replicates ( $n = 6$ ) was performed with a capped maximum flowrate of 200  $\mu\text{L}/\text{min}$  and reduced 50-kHz frequency resolution. The results of these experiments verify the position of the performance peak used for tracking.

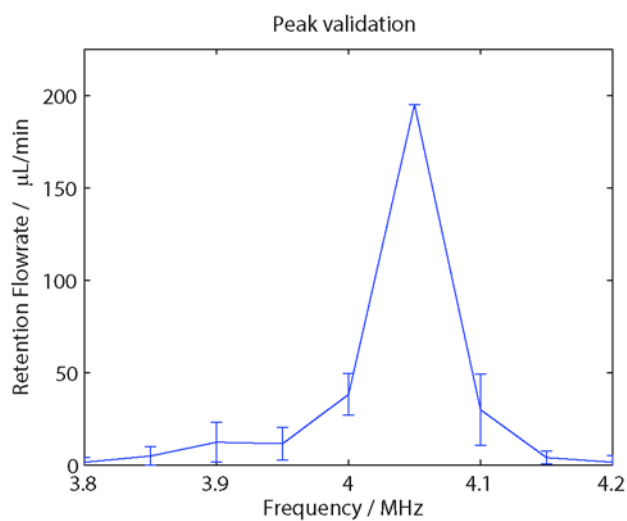

Supplement: c3lc51144h_2.pdf [file c3lc51144h_2.pdf]
